# Supplementary material for: A visual logic alarm sensor for diabetic patients towards diabetic polyneuropathy based on a metal–organic framework functionalized by dual-cation exchange
Source: Royal Society of Chemistry journal article supplement (doi:10.1039/d0tc05655c), 2021-01-01
Supplement: d0tc05655c1.pdf [file d0tc05655c1.pdf]

## Supporting information

### **A Visual Logic Alarm Sensor for Diabetic Patients towards Diabetic Polyneuropathy Based on Metal-Organic Framework Functionalized by Dual-Cation Exchange**

Yu Zhang<sup>‡<sup>a</sup></sup>, Xianglong Qu<sup>‡<sup>a</sup></sup> and Bing Yan<sup>\*<sup>a, b</sup></sup>

*<sup>a</sup> School of Chemical Science and Engineering, Tongji University, 1239 Siping Road, Shanghai  
200092, China*

*<sup>b</sup> School of Materials Science and Engineering, Liaocheng University, Liaocheng 252059, China*

Corresponding author Email addresses: [byan@tongji.edu.cn](mailto:byan@tongji.edu.cn) (Bing Yan)

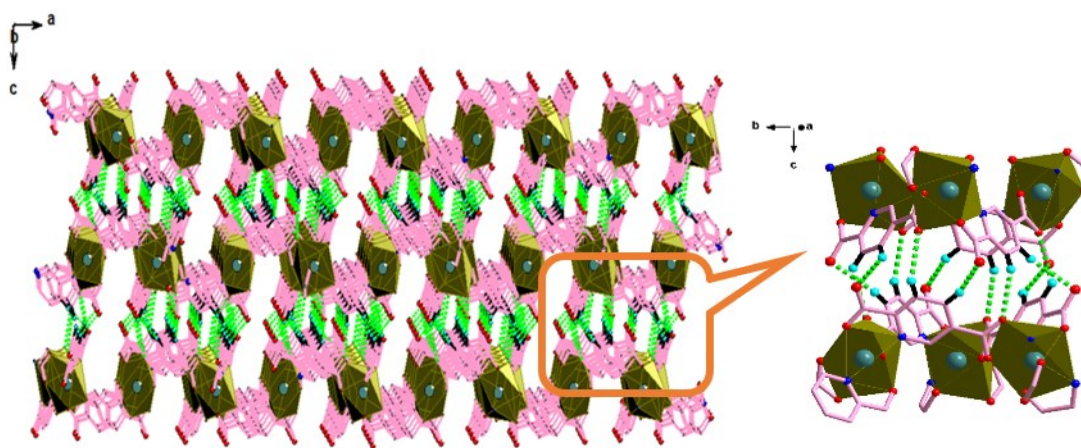

**Figure S1** Packing view of the In-pdc layers stacked along c direction based on C4–H4···O4 and C5–H5···O2 hydrogen bonds.

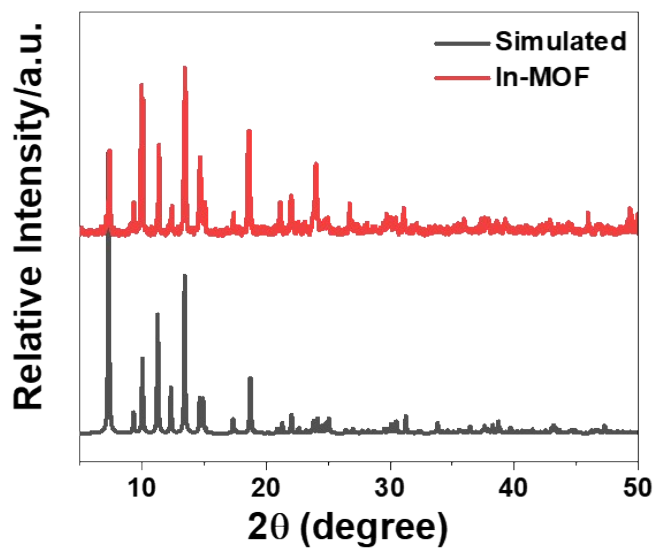

**Figure S2** The PXRD patterns of In-MOF and simulated one.

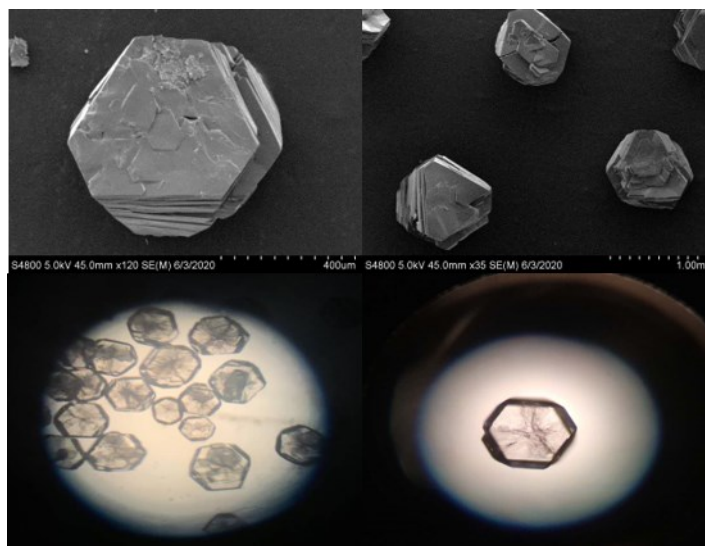

**Figure S3** The SEM image and optical images of In-MOF.

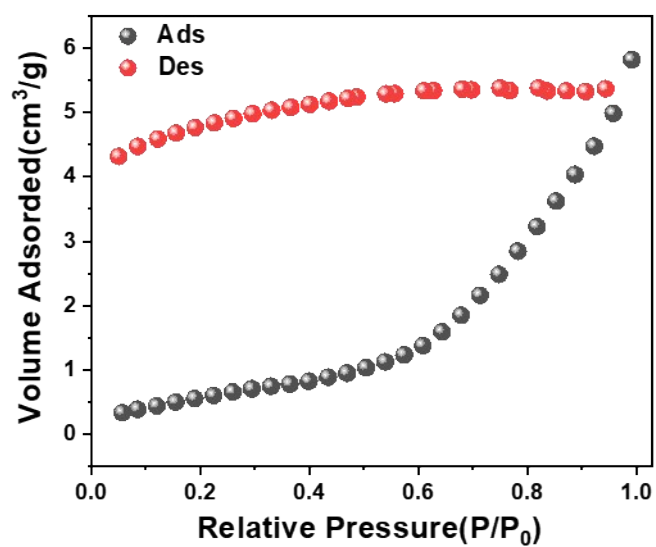

**Figure S4** N<sub>2</sub> adsorption/desorption isotherms of In-MOF.

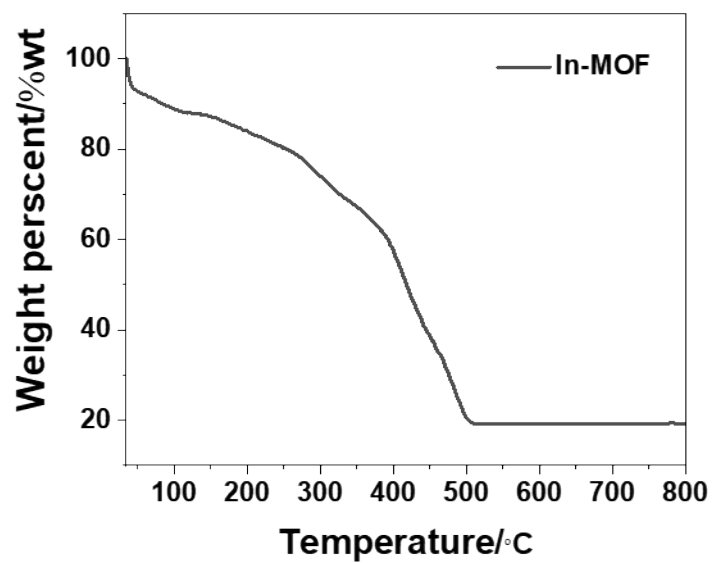

Figure S55 Thermal gravimetric analysis curves for In-MOF.

1

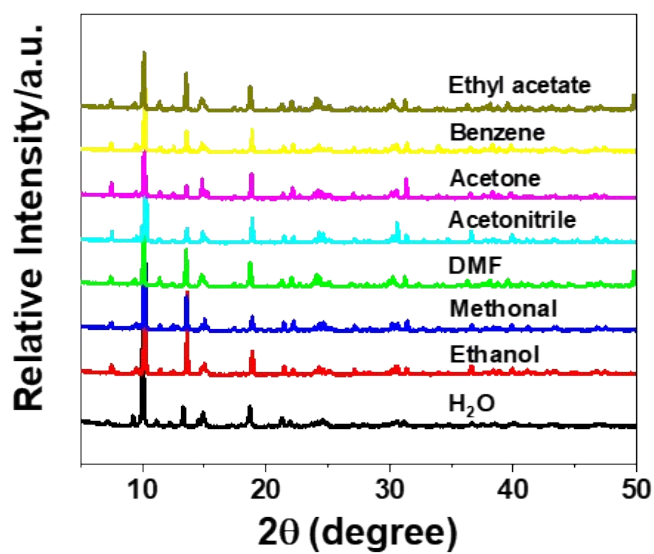

Figure S6 PXRD of In-MOF after being immersed in common solvents.

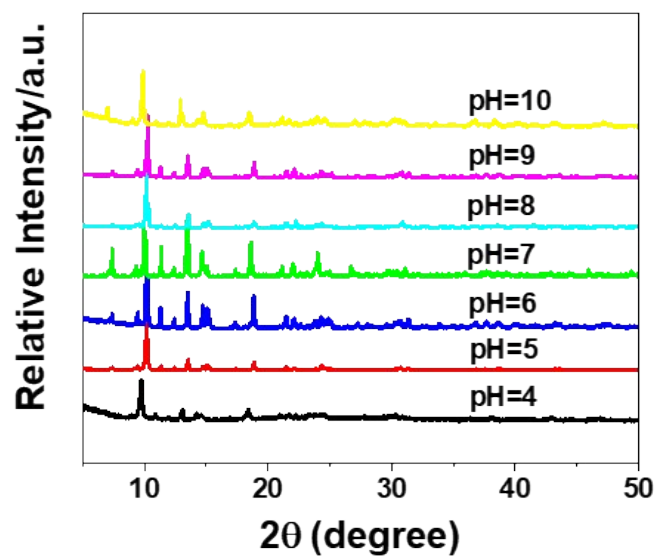

**Figure S7** PXR D of In-MOF after being immersed in the solutions of pH = 4-10.

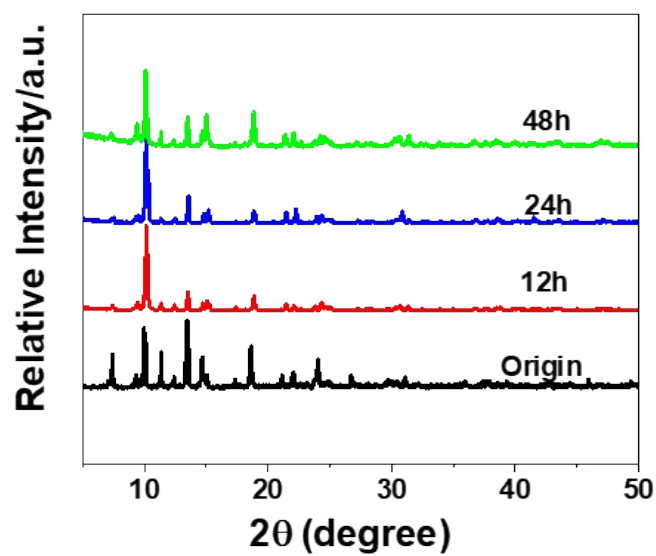

**Figure S8** PXR D of In-MOF after being immersed in the  $H_2O$  for 12-48h.

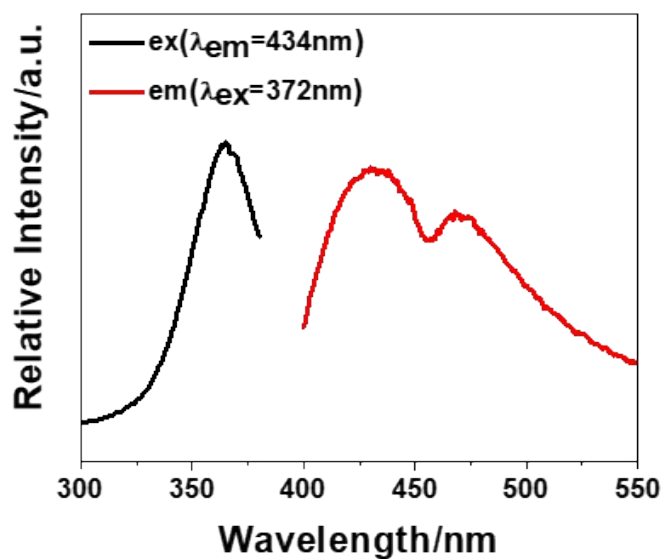

**Figure S9** Excitation (black line) and emission (red line) spectra of H<sub>2</sub>pdc.

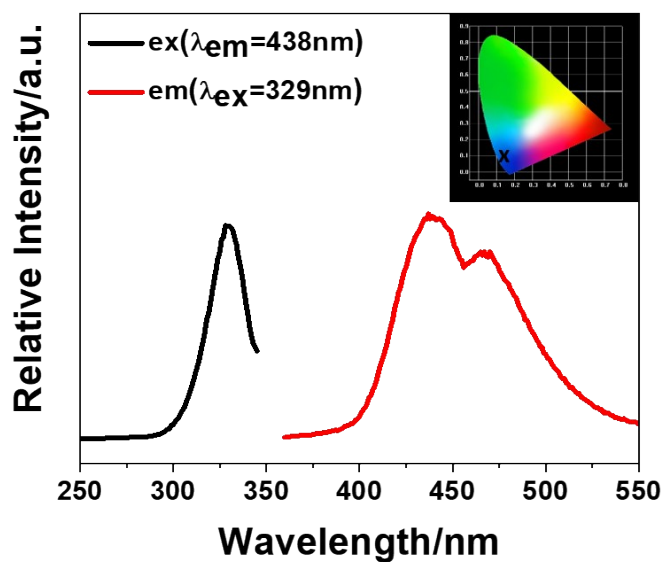

**Figure S10** Excitation (black line) and emission (red line) spectra of In-MOF (The inset is the corresponding CIE chromaticity diagram of In-MOF).

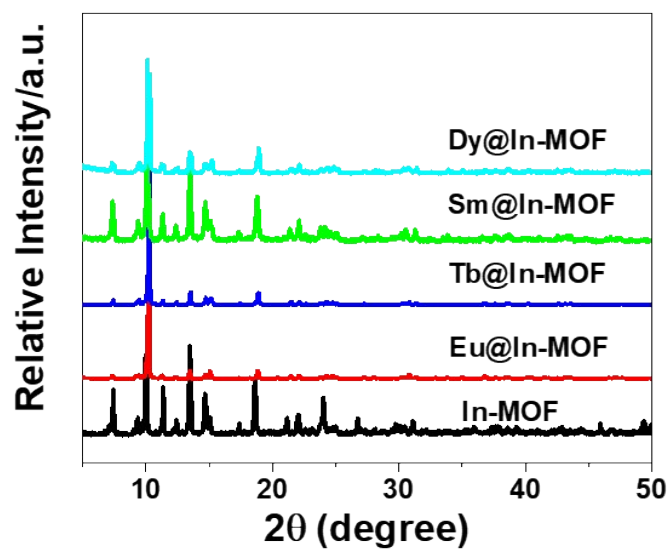

Figure S11 PXRD of Eu@In-MOF, Tb@In-MOF, Sm@In-MOF and Dy@In-MOF.

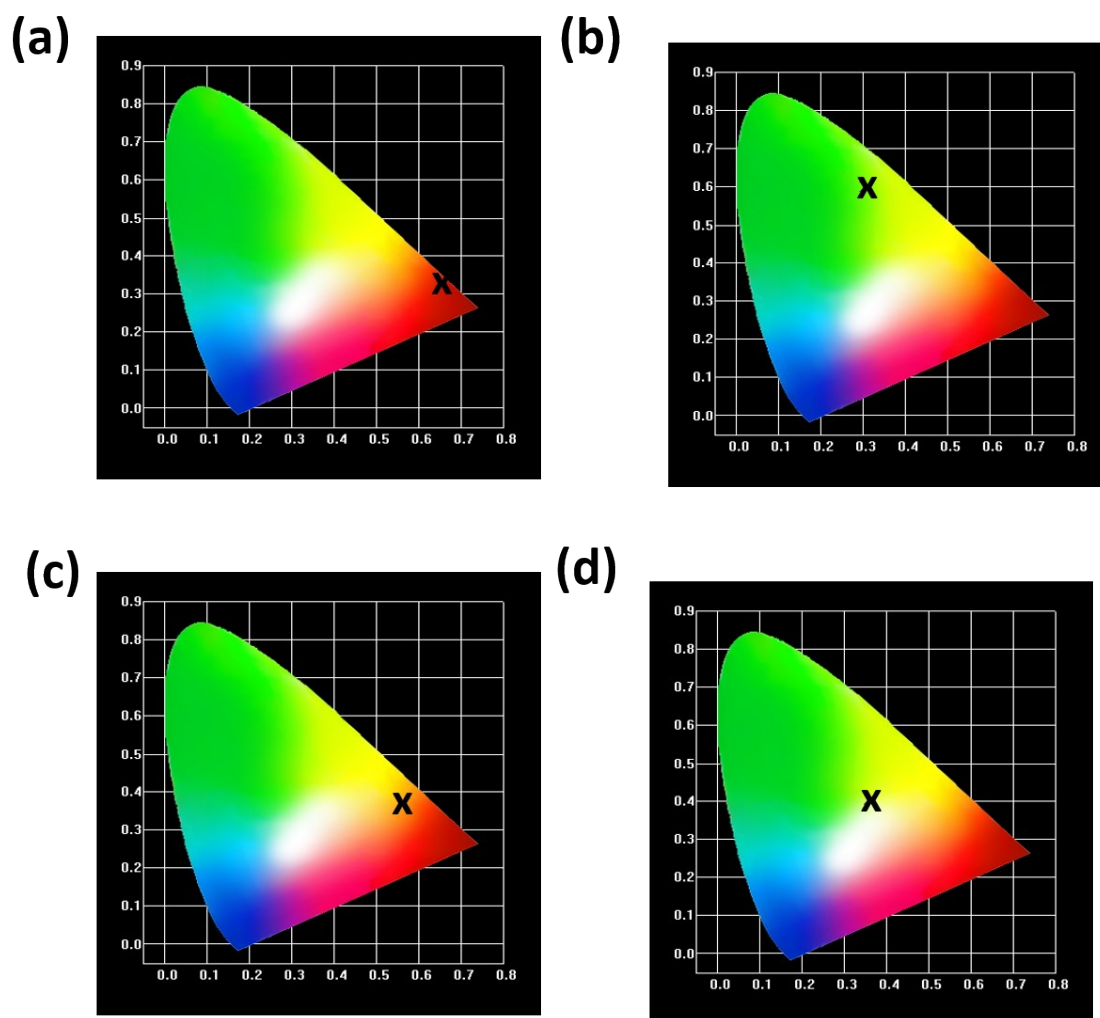

Figure S12 Corresponding CIE chromaticity diagram of (a) Eu@In-MOF; (b) Tb@In-MOF (c) Sm@In-

MOF; (d) Dy@In-MOF.

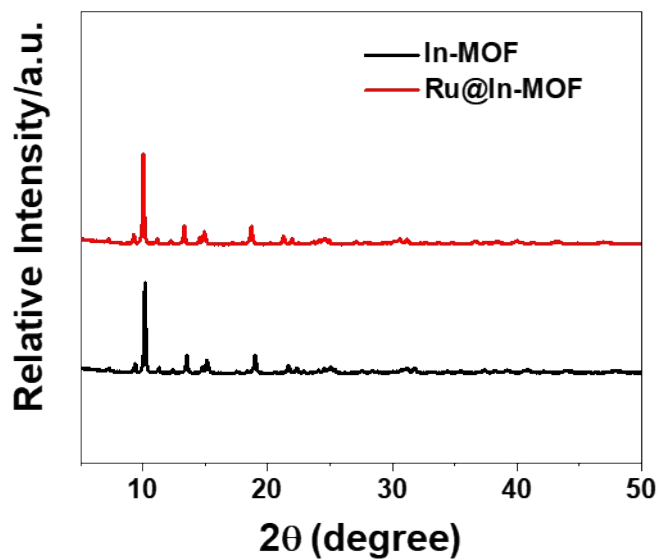

Figure S13 PXRD of In-MOF and Ru@In-MOF.

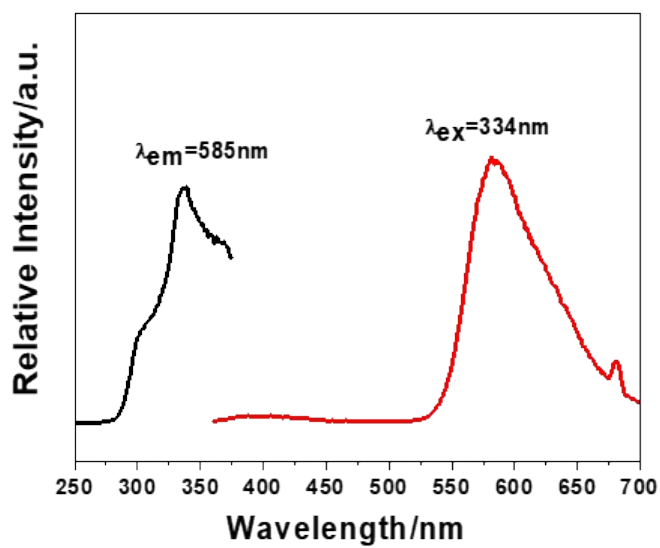

Figure S14 Excitation (black line) and emission (red line) spectra of Ru@In-MOF.



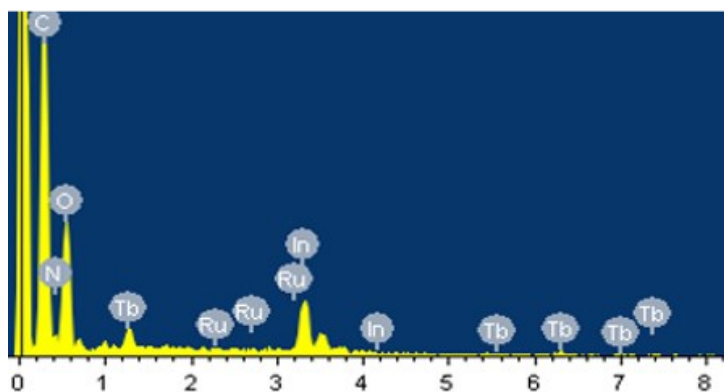

**Figure S15** Energy dispersive analysis by X-rays (EDX) spectroscopy of **Ru/Tb@In-MOF**.

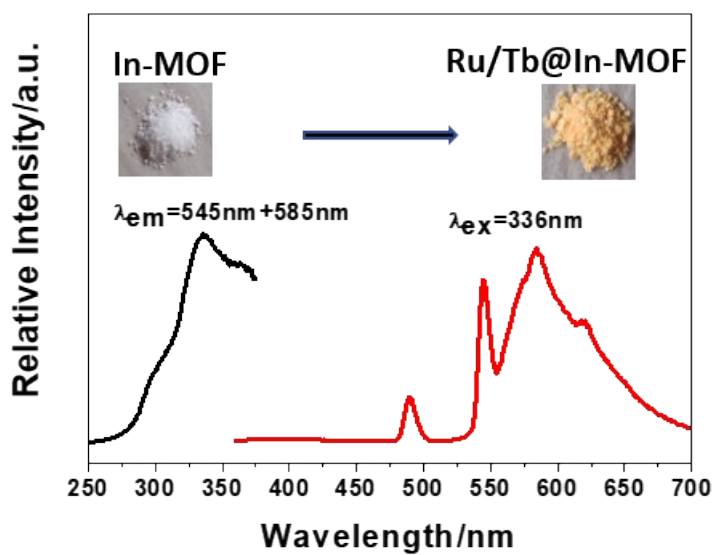

**Figure S16** Excitation (black line) and emission (red line) spectra of **Ru/Tb@In-MOF** (The inset is the photo of In-MOF and Ru/Tb@In-MOF power).

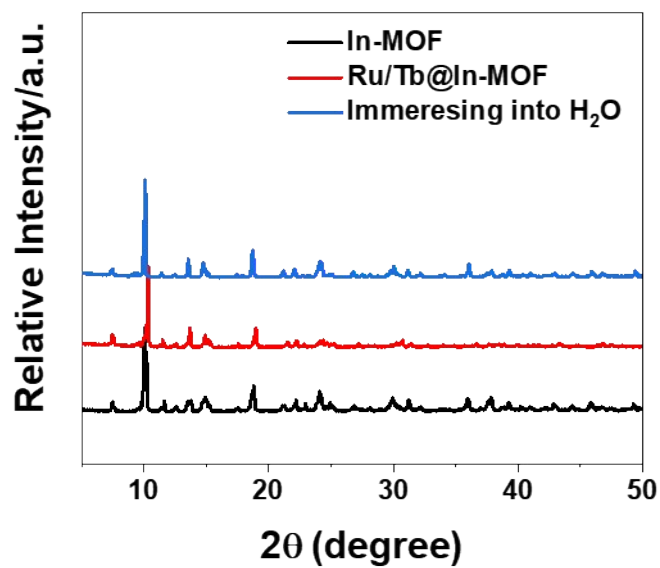

Figure S17 PXRD patterns of In-MOF, Ru/Tb@In-MOF and Ru/Tb@In-MOF immersing into H<sub>2</sub>O.

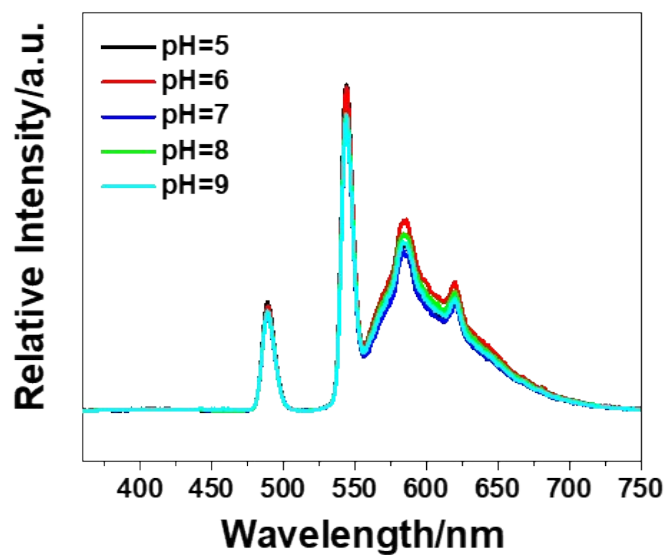

Figure S18 Emission spectra of Ru/Tb@In-MOF in different pH solutions.

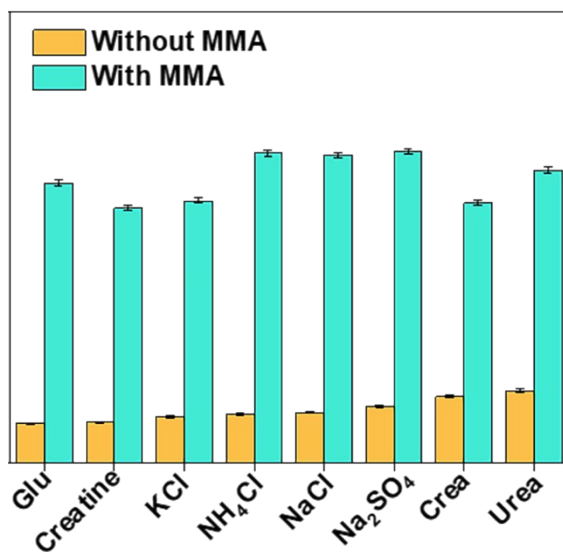

**Figure S19** Luminescence responses of **Ru/Tb@In-MOF** ( $I_{585\text{nm}}/I_{545\text{nm}}$ ) toward other urine components with and without MMA.

(a)

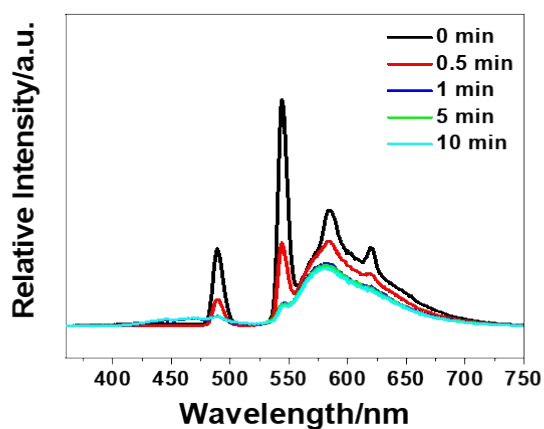

(b)

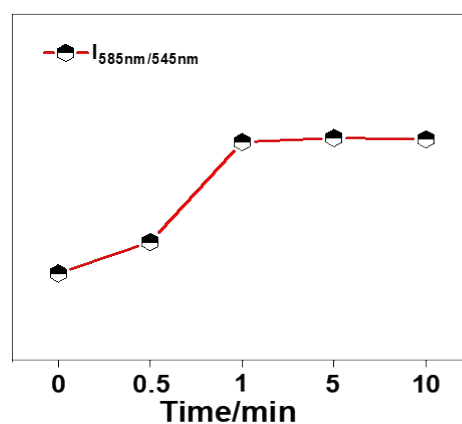

**Figure S20** (a) Variation of luminescent intensity of **Ru/Tb@In-MOF** with different immersion time in MMA; (b) The corresponding line chart.

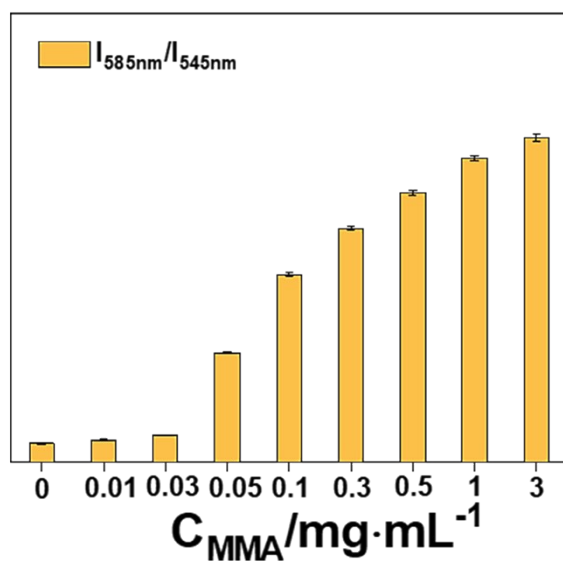

**Figure S21** The column diagram of the fluorescence intensity of Ru/Tb@In-MOF ( $I_{585\text{nm}}/I_{545\text{nm}}$ ) after immersing into different concentrations of MMA.

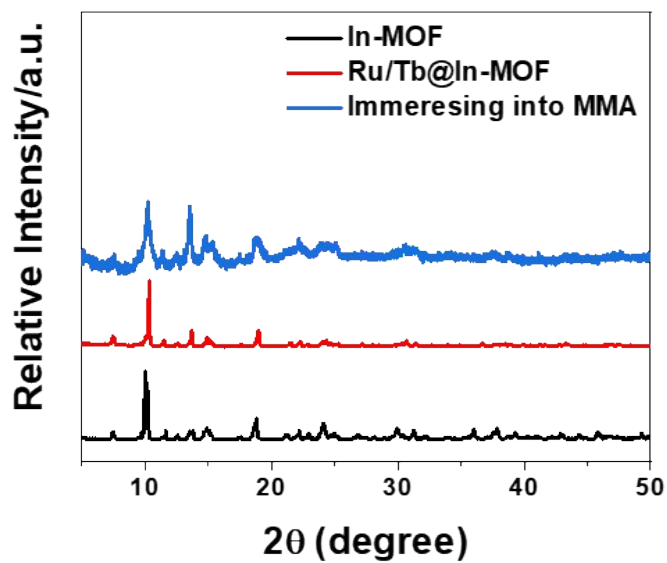

**Figure S22** PXRD patterns of In-MOF, Ru/Tb@In-MOF and Ru/Tb@In-MOF immersing into MMA.

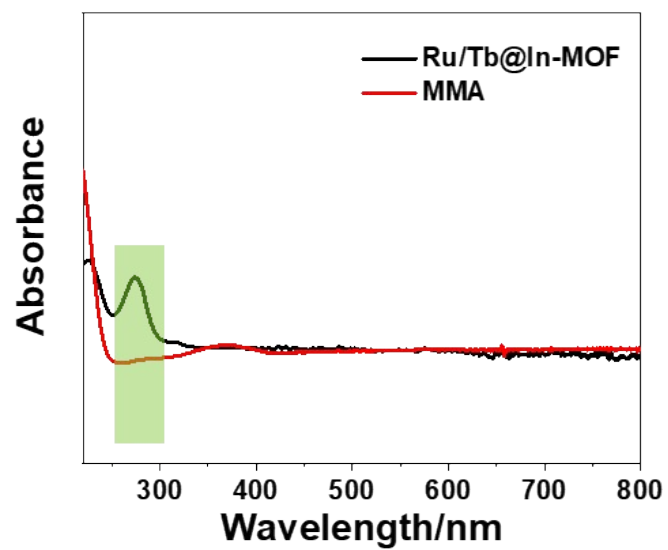

Figure S23 UV-vis spectra of Ru/Tb@In-MOF and MMA.

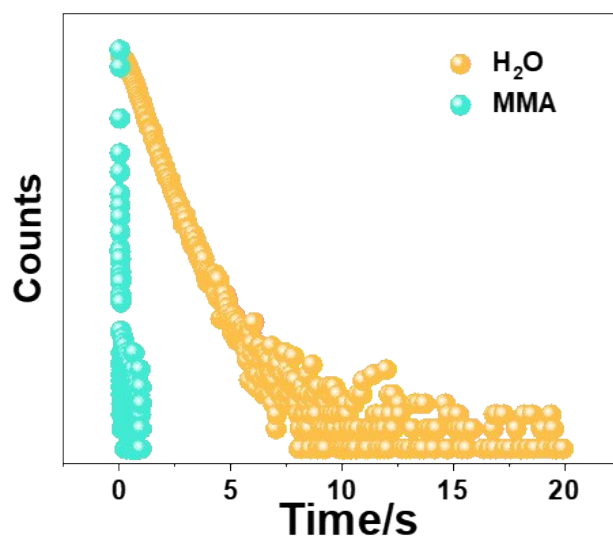

Figure S24 Luminescence decay curves of Ru/Tb@In-MOF immersed in H<sub>2</sub>O and MMA.

**Table S1** Crystal data and structure refinement for **In-MOF**

| Complex                                              | In-MOF                                                           |
|------------------------------------------------------|------------------------------------------------------------------|
| Empirical formula                                    | C <sub>16</sub> H <sub>14</sub> N <sub>3</sub> O <sub>8</sub> In |
| Formula weight                                       | 491.03                                                           |
| monoclinic                                           |                                                                  |
| Space group                                          | R-3c                                                             |
| <i>a</i> / Å                                         | 15.7001(4)                                                       |
| <i>b</i> / Å                                         | 15.7001(4)                                                       |
| <i>c</i> / Å                                         | 52.849(3)                                                        |
| $\alpha$ / (°)                                       | 90                                                               |
| $\beta$ / (°)                                        | 90                                                               |
| $\gamma$ / (°)                                       | 120                                                              |
| Volume / Å <sup>3</sup>                              | 11281.6(8)                                                       |
| <i>Z</i>                                             | 18                                                               |
| Calculated density / mg·m <sup>-3</sup>              | 1.179                                                            |
| Absorption coefficient / mm <sup>-1</sup>            | 0.972                                                            |
| <i>F</i> (000)                                       | 3906                                                             |
| Crystal size / mm                                    | 0.36 × 0.24 × 0.12                                               |
| $\theta$ Range for data collection / (°)             | 3.09-27.573                                                      |
|                                                      | -20 ≤ <i>h</i> ≤ 20                                              |
| Limiting indices                                     | -20 ≤ <i>k</i> ≤ 20                                              |
|                                                      | -68 ≤ <i>l</i> ≤ 67                                              |
|                                                      | 50685/2905                                                       |
| Reflections collected / unique                       | [ <i>R</i> (int)=0.0625]                                         |
| Data / restraints / parameters                       | 2905/0/114                                                       |
| Goodness-of-fit on <i>F</i> <sup>2</sup>             | 1.050                                                            |
| <i>R</i> <sub>1</sub> [ <i>I</i> > 2σ( <i>I</i> )]   | 0.0518                                                           |
| w <i>R</i> <sub>2</sub> [ <i>I</i> > 2σ( <i>I</i> )] | 0.1904                                                           |
| <i>R</i> <sub>1</sub> [all data]                     | 0.0650                                                           |
| w <i>R</i> <sub>2</sub> [all data]                   | 0.2005                                                           |
| Largest diff. peak and hole / e·Å <sup>-3</sup>      | 2.291 and -0.800                                                 |
| CCDC                                                 | 2023759                                                          |

**Table S2** Selected bond lengths [Å] for In-MOF

| In-MOF              |            |
|---------------------|------------|
| In(1)-O(1)#1        | 2.157(4)   |
| In(1)-O(1)          | 2.157(4)   |
| In(1)-O(3)#2        | 2.199(4)   |
| In(1)-O(3)#3        | 2.199(4)   |
| In(1)-N(1)#2        | 2.269(4)   |
| In(1)-N(1)#3        | 2.269(4)   |
| O(1)#1-In(1)-O(1)   | 95.0(2)    |
| O(1)-In(1)-O(3)#3   | 83.75(16)  |
| O(1)-In(1)-O(3)#2   | 125.08(15) |
| O(1)#1-In(1)-O(3)#3 | 125.07(15) |
| O(1)#1-In(1)-O(3)#2 | 83.75(16)  |
| O(1)#1-In(1)-N(1)#3 | 86.30(16)  |
| O(1)-In(1)-N(1)#2   | 86.31(16)  |
| O(1)-In(1)-N(1)#3   | 152.07(16) |
| O(1)#1-In(1)-N(1)#2 | 152.08(16) |
| O(3)#3-In(1)-O(3)#2 | 139.6(2)   |
| O(3)#2-In(1)-N(1)#2 | 72.93(14)  |
| O(3)#2-In(1)-N(1)#3 | 82.82(15)  |
| O(3)#3-In(1)-N(1)#3 | 72.94(14)  |
| O(3)#3-In(1)-N(1)#2 | 82.83(15)  |
| N(1)#3-In(1)-N(1)#2 | 105.3(2)   |

Symmetry transformations used to generate equivalent atoms: #1  $-x+4/3, -x+y+2/3, -z+7/6$ ; #2  $-y+1, x-y+1, z$ ; #3  $y+1/3, x+2/3, -z+7/6$ .

**Table S3** Repeated ICP-MS results of Ru/Tb@In-MOF.

| <b>Ru/Tb@TJU-12</b> | <b>Content of In</b> | <b>Content of Tb</b> | <b>Content of Ru</b> |
|---------------------|----------------------|----------------------|----------------------|
| <b>1</b>            | <b>14.96%</b>        | <b>5.27%</b>         | <b>3.26%</b>         |
| <b>2</b>            | <b>15.15%</b>        | <b>4.91%</b>         | <b>3.57%</b>         |
| <b>3</b>            | <b>14.68%</b>        | <b>5.05%</b>         | <b>3.06%</b>         |

**Table S4** The luminescence decay times of Ru/Tb@In-MOF in H<sub>2</sub>O and MMA.

| <b>Substance</b>      | <b>Lifetimes(<math>\mu</math>s)</b> |
|-----------------------|-------------------------------------|
| <b>H<sub>2</sub>O</b> | <b>858.53<math>\mu</math>s</b>      |
| <b>MMA</b>            | <b>10.31<math>\mu</math>s</b>       |
